# Supplementary material for: Management dilemmas in acute pulmonary embolism
Source: HighWire-hosted journal article supplement (doi:10.1136/thoraxjnl-2013-204667), 2013-12-16
Supplement: thoraxjnl-2013-204667supp.pdf [file thoraxjnl-2013-204667supp.pdf]

| Reference | Indication for thrombolysis | Number of patients                                    | Type of surgery                                                                                                                              | Time since surgery                                                | Outcome                                                                               |
|-----------|-----------------------------|-------------------------------------------------------|----------------------------------------------------------------------------------------------------------------------------------------------|-------------------------------------------------------------------|---------------------------------------------------------------------------------------|
| 17        | PE                          | 17                                                    | Gastrectomy, resection of cholangiocarcinoma, lobectomy, THR, CS, internal fixation of the spine, open reduction/fixation of tibia or fibula | Within 3 weeks (14 within 6 days, 11 within 3 days)               | Mild haematuria or surgical site bleeding in 71%. One death due to PE.                |
| 16        | PE                          | 1. 4<br>2. further 9 in review of Japanese literature | lobectomy                                                                                                                                    | 1. 2– 7 days<br>2. 6 between day 1 -6, 2 day 11, 1 day 22         | 1. no bleeding<br>2. 2 deaths (thrombolysed day 1 and 4) without further information. |
| 14        | PE                          | 1                                                     | Lobectomy                                                                                                                                    | 5 days                                                            | No bleeding                                                                           |
| 15        | PE                          | 3                                                     | Lobectomy                                                                                                                                    | 0 – 5 days                                                        | Surgical site bleeding with transfusion in 2, massive haemorrhage in 1. All survived. |
| 21        | PE                          | 1                                                     | Lobectomy                                                                                                                                    | 2 days                                                            | No major bleeding                                                                     |
| 20        | PE                          | 1                                                     | Lobectomy                                                                                                                                    | 2 days                                                            | Massive haemorrhage requiring 21 units red cells. Survived.                           |
| 18        | PE                          | 2                                                     | Pneumonectomy                                                                                                                                | 2 days                                                            | Massive haemorrhage in 1. Both survived.                                              |
| 19        | PE                          | 1                                                     | Multitrauma with severe bleeding                                                                                                             | 4 days                                                            | Massive bleeding. Survived.                                                           |
| 25        | PE                          | 9                                                     | Craniotomy in 7, laminectomy in 1, VP shunt in 1                                                                                             | 1 on day7, 4 on days 8 – 14, 2 on days 14 – 21, 3 on days 22 - 34 | Subgalleal haematoma in 1. This patient died of recurrent PE 6 days later.            |
| 26        | PE                          | 1                                                     | Roux and Y gastric bypass                                                                                                                    | 5 days                                                            |                                                                                       |
| 24        | Prosthetic valve thrombosis | 1                                                     | Subtotal proctocolectomy with ileorectal anastomosis                                                                                         | 6 days                                                            | No major bleeding                                                                     |
| 23        | PE                          | 1                                                     | Laparotomy                                                                                                                                   | 1                                                                 | Intraperitoneal haemorrhage requiring 26 units red cells and repeat laparotomy day 6  |
| 22        | Stroke                      | 1                                                     | THR                                                                                                                                          | 2 days                                                            | Surgical site bleeding requiring 3 units red cells                                    |
| 36        | PE                          | 1                                                     | TKR                                                                                                                                          | 5 days                                                            | Minor wound site bleeding                                                             |
| 37        | PE                          | 1                                                     | Pulmonary endarterectomy                                                                                                                     | Day 5                                                             | No bleeding                                                                           |
| 27        | PE                          | 1                                                     | Caesarian section                                                                                                                            | Day 0                                                             | Massive haemorrhage. Survived.                                                        |
| 30        | PE                          | 1                                                     | Caesarian section                                                                                                                            | Day 0                                                             | Massive haemorrhage. Survived.                                                        |
| 29        | Stroke                      | 2                                                     | Dental surgery                                                                                                                               | Day 5 and day 7                                                   | Mouth bleeding                                                                        |

|    |        |   |                                                                                                                       |                |                                                      |
|----|--------|---|-----------------------------------------------------------------------------------------------------------------------|----------------|------------------------------------------------------|
| 28 | Stroke | 1 | Rhytidectomy and blepharoplasty                                                                                       | 1 day          | Haematoma requiring evacuation                       |
| 33 | MI     | 1 | Cataract surgery                                                                                                      | 2 days         | Orbital haematoma resulting in blindness             |
| 35 | PE     | 2 | Sarcoma resection thigh & open reduction and fixation of the wrist                                                    | Day 13 & day 1 | No bleeding & haematoma requiring evacuation         |
| 32 | PE     | 1 | Hemiarthroplasty for fractured neck of femur                                                                          | 2 weeks        | Bilateral orbital haematoma. No wound site bleeding. |
| 31 | PE     | 1 | Abdominal aneurysm repair                                                                                             | 2 weeks        | No bleeding.                                         |
| 34 | Stroke | 1 | Severe head trauma                                                                                                    | 3 weeks        | Fatal ICH                                            |
| 13 | stroke | 8 | Past history of meningioma resection, shunt insertion for normal pressure hydrocephalus and severe cerebral contusion | n/a            | No bleeding                                          |

**Online Data Supplement:**

**Table 3: Thrombolysis following surgery: case reports and series in the literature**
